# Supplementary material for: Parallel on-line detection of a methylbismuth species by hyphenated GC/EI-MS/ICP-MS technique as evidence for bismuth methylation by human hepatic cells
Source: Royal Society of Chemistry journal article supplement (doi:10.1039/b911945k), 2009-10-06
Supplement: b911945k.pdf [file b911945k.pdf]

## Electronic Supplementary Information

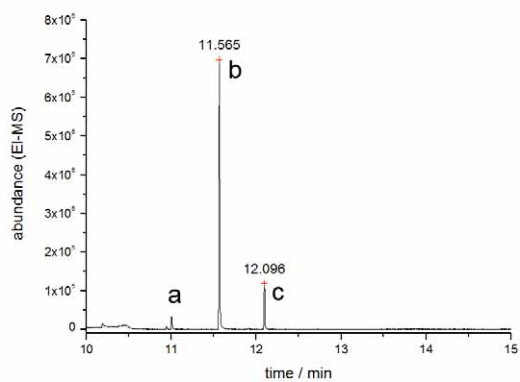

Figure S1: Ethylation of a Methylbismuth cysteine standard in aqueous solution

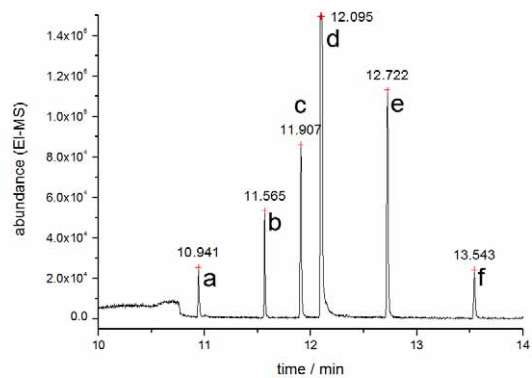

Figure S4: Ethylation of HepG2 cell lysate after incubation with bismuth cysteine

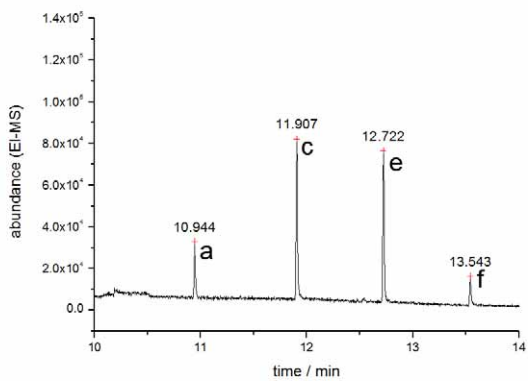

Figure S2: Blank without incubation

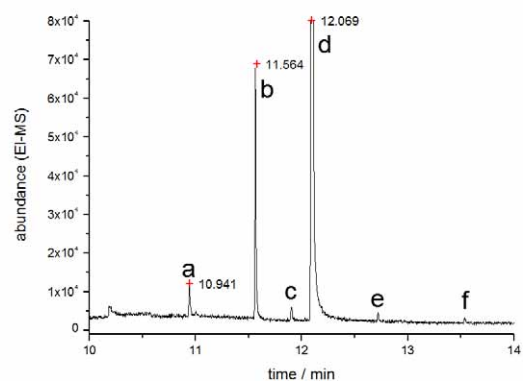

Figure S5: Ethylation of HepG2 cell lysate after incubation with CBS

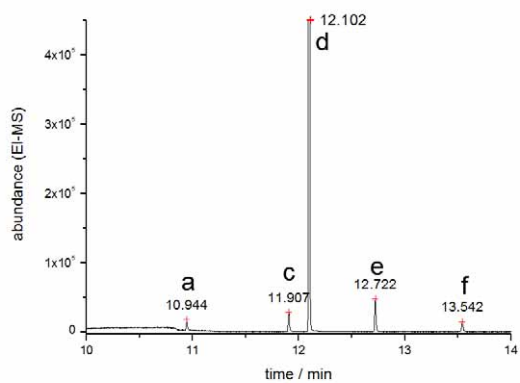

Figure S3: Blank without HepG2
